# Supplementary material for: Improved uniaxial dielectric properties in aligned diisopropylammonium bromide (DIPAB) doped poly(vinylidene difluoride) (PVDF) nanofibers
Source: Royal Society of Chemistry journal article supplement (doi:10.1039/c9ra06470b), 2019-01-01
Supplement: c9ra06470b1.pdf [file c9ra06470b1.pdf]

## Improved uniaxial dielectric properties in aligned diisopropylammonium bromide (DIPAB) doped Poly-(vinylidene difluoride) (PVDF) nanofibers

Vaibhav Singh Bhugra,<sup>a</sup> Mohsen Maddah,<sup>a</sup> Grant V. Williams,<sup>a</sup> Natalie Plank,<sup>a</sup> and Thomas Nann<sup>\*b</sup>

### Supplementary information

The elemental mapping at high magnification using Scanning electron microscopy (SEM) setup with energy dispersive X-Ray spectrometry (EDS) was performed on DIPAB doped PVDF nanofibers sample to study the presence of DIPAB inside the PVDF nanofibers. Figure 1 shows that the elemental signals of Bromine and Nitrogen from DIPAB coincides with the elemental signals observed from PVDF structures (Fluorine).

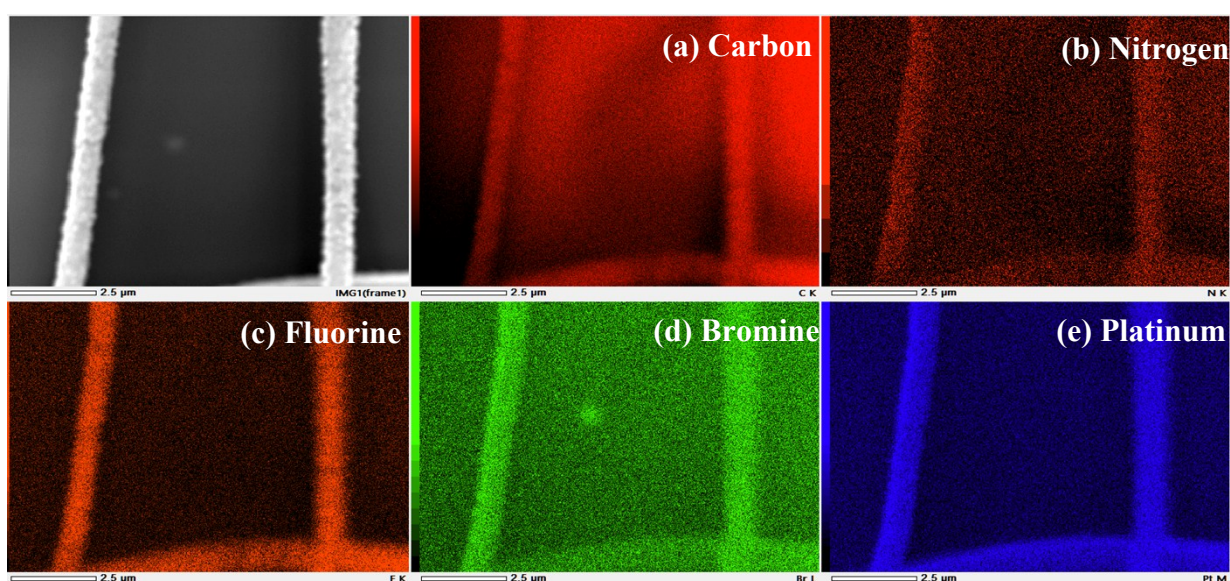

Table 1 - EDXS of DIPAB 5% composite nanofibers sample. The signals from DIPAB having (b) Nitrogen and (d) Bromine coincides with (c) Fluorine from PVDF proving the presence of DIPAB within the nanofibers.
